# Supplementary material
Source: PubMed Central journal article supplement (PMC6938231)
Supplement: NIHMS1545214-supplement-Fig_1.pdf [file NIHMS1545214-supplement-Fig_1.pdf]

**Fig. S1. Analysis of APEX2 modifiable targets of Inc proteins.**

-APEX2 targeted amino acids in **red** (Y, W, H, C (Rhee et al 2013 Science))  
-Transmembrane domains (TOPCONS predicted topologies) are **underlined**

> CT223 WP\_010725128.1 hypothetical protein [Chlamydia trachomatis]  
MVSLALGTSNGVEANNGINDLSPAPEAKKTGSGLCYKisavaalvlgllaaaggavvlALFCTFAPPLff  
agvalvalgavilgvqvsNT**CSCCL**RSRKIEAHKQLILQQKEEISQLEQQLAYPASLLERRDLRENKA  
WQ**SCCL**NLEKEVRDLLTKLGGYQERLKVLPAAKEKQIEELKAMLE**HYSRICH**ERGELINLLKTAN  
KKLSKESEKLLFN**YKAHRDVCL**GEKVLVKSVDLIDLPKSDSSDGDGDDDDGFNYGSRV  
14 APEX2

> CT119 IncA WP\_009871466.1 inclusion membrane protein A [Chlamydia trachomatis]  
MTTPTLIVTPPSPAPSYSANRVPQPSLMDKIKKIaaia*sliligtigflalghl*VGFLiapqitivil  
alfiislagnAL**YL**QKTANL**HLY**QDLQREVGSLKEINFMLSVLQKEFL**HLS**KEFATTSKDL SAVSQDF  
**YSC**LQGFRDNYKGFESLLDE**YKN**STEEMRKLFSQEIADLKGSVASLREEIRFLTPLAEEVRRLA  
**HN**QQSLTVVIEELKTIRDSLRDEIGQLSQLSKTLTSQIALQRKESDL**CS**QIRETLSSPRKSASPS  
TKSS  
11 APEX2

>CT117 IncF  
MGDVMIQSVKTESGLVEG**H**RGI**C**DSLGRVVGALAKVAKIvvalaalvlnгалcvlsivaLCVGATPVGP  
avlvattlasflcaacvfiAAKDRG**W**IASTNK**C**  
4 APEX2

> CT115 IncD WP\_009871462.1 inclusion membrane protein D [Chlamydia trachomatis]  
MTKV**Y**ANSIQQERVVDRIALLER**C**LDPNSNLPTAKRLvavavatilavallvvaqlifsgvLCSPV**Sv**laaslf  
fgvgafllggalvgGVLTTEAVTRERL**H**RSQTL**MW**NNL**CCK**TAEVEQKISTASANAKSNDKTRKLGE  
6 APEX2

> CT118 IncG WP\_009871465.1 inclusion membrane protein G [Chlamydia trachomatis]  
MI**CC**DKVLSSVQSMPVIDK**CS**VT**KCL**QTAQAAvlaalsifavfasgsilsaavifsGTAAVLPy*liltallgf*  
vcavivlrnlSAVVQ**SC**KKRSPEEIEGAARPSDQQESGGRLSEESASPQASPTSSTFGLESALRSI  
GDSVSGAFDDINKDNSRSR**HSF**  
6 APEX2

> IncE tr|B7SCH9|B7SCH9\_CHLTH IncE OS=Chlamydia trachomatis  
ME**C**VKQL**CRNHL**RLDNLTDPVRSVLTKGTTAEKVQLAACCLGVVCSIICLALGIAAAAVGV**SC**  
G  
GFALGLGIIALLGIVLFATSALDVLEN**H**GLVGC**PF**KLP**C**KSSPANEPAVQFFKGKNGSADQVIL  
VTQ  
7 APEX2

>CT226 L2  
LRNRGAMFNISF**CC**NSSKPLRAD**H**TETIGAQTTTSRKEQLLAIGALVGLVAVLGGALLLLFSG  
SVLSLFAPIL**SLLAMTLGSACIGGSLVYMY**GFSLKPTRLPESSGLAPEAVTPGLVLS**YQELLYE**  
AEEDLKEVEGLLAQKSKDLELAQKKIEQLQSGLK**C**VLEESLR  
6 APEX2

>OmcB YP\_001654774.1 outer membrane protein OmcB [Chlamydia trachomatis 434/Bu]  
MRIGDPMNKLIRRAVTIFAVTSVASLFASGVLETSMAEFISTNVISLADTKAKDNTSHKSKKARKN  
HSKETPVNRKKVAPVHESKATGPKQDSCFGRMYTVKVNDDRNVEITQAVPKYATVGSPPVEI  
TATGKRDCVDVIITQQLPCEAEFVRSDPATTPTADGKLVWKIDRLGQGEKSKITVWVKPLKEGC  
CFTAATVCAACPEIRSVTKCGQPAICVKQEGPENACLRCPVVYKINVVNQGATARNVVENPV  
PDSYAHSSGQRVLTFTLGDMPGEHRTITVEFCPLKRGRATNIAMVSYCGGHKNTASVTTVIN  
EPCVQVSIAGADWSYVCKPVEYVISVSNPGDLVLRDVVVKDTLSPGVTVLEAAGAQAISCNKVV  
WTVKELNPGESLQYKVLVRAQTPGQFTNNVVVKS CSDCGTCTSCAEATTYWKGVAAATHMCMV  
VDTCDPVCVGENTVYRIVCTNRGSAEDTNVSLMLKFSKELQPVSFSGPTKGTITGNTVVFDSL  
RLGSKETVEFSVTLKAVSAGDARGEAILSSDTLTPVSDTENTHIY  
49 APEX2

>MOMP YP\_001654141.1 major outer membrane porin [Chlamydia trachomatis 434/Bu]  
MKKLLKSVLVFAALSSASSLQALPVGNPAPESLMIDGILWEGFGGDP CDPCTTWCD AISM RMG  
YYGDFVDFDRVLQTDVNKEFQMGAKPTTATGNAAAPSTCTARENPAYGRHMQDAEMFTNAAY  
MALNIWDRFDVFC TLGATSGY LKGN SASFNLVGLFGDNENHATVSDSKLVPNMSLDQSVVELY  
TDTTFAWSAGARAALWECGCATLGASFQYAQSKPKVEELNVL CNAAEFTINKPKGYVVGQEFPL  
DLKAGTDGVTGTKDASIDYHEWQASLALS YRLNMFTPYIGVKWSRASFDADTIRIAQPKSATTV  
FDVTTLNPTIAGAGDVKASAEQQLGDTMQIVSLQLNKMKS RKS CGIAVGT TIVDADKYAVTVET  
RLIDERA AHVNAQFRF  
26 APEX2

CT228 >tr|O84231|O84231\_CHLTR Uncharacterized protein OS=Chlamydia trachomatis (strain  
D/UW-3/Cx) OX=272561 GN=CT\_228 PE=4 SV=1  
MSTTISGDASSLPLPTASCVEIKSTSSSTKGNTCSKIL dialaivgalvvvaglalv |CASNV iftaigiaalii  
gsacvqagi SRLMCRSSYASLEAKNVLAEQRLRNLSEEKDALVSVSFINKMFLRGLTDDLQALEA  
KAIEVEIDCLDRLEKNEQALLSDVRLVLSSYTRWLD SAEKEKAALKASIDANQAS  
APEX2

> CT850 WP\_009872976.1 hypothetical protein [Chlamydia trachomatis]  
MGFGTVRGK GKAVKSFFLRP lqnlevqlfslpivlllqeig CVSSIS svslvavlsivqvfvalvsffRswqyqlsvv  
gaiffglalcnn FPVSV vwgqlltvsfiisylls VSLVEGHIKEKAVSLSELTASHNSLQDSYNREVQERK  
EKELLAQSKITALEQELSVSHEQLQEVSRYTHASEDLQILIDQRDSWLKDYMTLHQEYVRVVA  
GDEENVIFPWKVVFQGNSEKDSGYQQRVQDAEHKIAHLEKLC EEENSGKRYAEECLDKALADLL  
ESTRLREILEKEIFQKDEEIASLKQEIAAEKLLSSSVSDDRAAYKGGKYLQLREQFTVKDSFLKKAR  
RERFLAQEQLLVLKRAKEEEASNLSTTDSFSIIQNLLLQIEALEEEVTYLEELVLHNQNR  
21 APEX2

> CT005 WP\_009871351.1 hypothetical protein [Chlamydia trachomatis]  
MTPVTPVPPQSPQQVKLLSRFLTAPDRHPKLRV vdialiaisilcivsiilwtg GSG lalfaiapalaigalqv  
tliv SDLAESQKSKEIADTVAAVSL pfiltgtaaglmfsaiavgggavilanplfmgsmtlqfalmsL HRVYQYL  
SNREQWKQKKLEQVELAAWESHLPKESKSSALEEVRYSPRLMKRGKTWRKRAIRRKNYTP  
PLVDKTLQTMQPDALFSSTTTHTSDSEQILTSVSPQSSDTESSSSSFHTPPNSDKELSDSNSS  
DSSSSSEYMDALETVAAGDVSGITPPSKPSSSPKTRRVVKLRSERNAQHHRNKDQEQRQD  
SSESSEEDSSSDSSQKKKPSRK  
16 APEX2

> CT249 WP\_010725138.1 hypothetical protein [Chlamydia trachomatis]  
MGIKPHDHGCWGSRGNI FTLDLTDQQANQSAASSSSVLKSECTAKVARY algflfglqfilsivtfia  
aaATLplgtvtilimvtqaafaala FKL YDLFKHDVPTCSITSKA  
9 APEX2

> CT058 WP\_010725013.1 hypothetical protein [Chlamydia trachomatis]  
MFTSLSAIQNAIRPS**C**QLPVLTPRRalitslasgiilqlagcvvqvLASFPAliavsavilqvsifasgl  
**flc**R**YV**CPPKIVSRRPSTELPAEPTPELPEIKRPKPIAPPPDFIPPRPLRRTIGEMLF**GW****C**IGSIR  
QMPFFLANDKTPLSFRNPSARFRA**W**NIPST**H**TIFVSTSGQFSSLRMQSNLPAAIANATQSAFA  
KRGQGGLGVNDAFPAVLTDK**CW**EESKPDGILLPGE**C**SSAT**W**EDKN**HLVP****CW**DEETK**T**Y**N**KP  
LLFIQMLAPKAS**Y**QDDSK**S****C**YEITLRA**Y**T**A****C**FEEAIR**C****G**CRIIQIPLIAAFGDFVPRALSKQP**K****W**I  
ESAKLSLL**H**AVEKTAK**H**ASKDLVIVLTNIPQPVNL  
25 APEX2

> IncB (AM884176.1:577850-578194 Chlamydia trachomatis strain L2/434/Bu)  
MV**H**SV**Y**NSLAPEGFSQVSIQPSQIPTSKKVMIAIMTLFALTAIAAIVLSIVTVCGGFPFLAALNTV  
TIG**A****C****V****S****L****P****I****F****T****C****I****A****T****T****L****L****L****L****C**L**R**NIELLARPQVLT**L**STQFSPTKPQE  
6 APEX2 residues

>CT101 (CTL0356)  
MISMIP**R****F****S****I****A****C****I****P****L****A****V****W****L****F****S****G****A****K****L****L****V****K****S****L****Y****L****A****L****H****Y****Q****F****S****L****V****L****S****A****E****L****F****A****I****A****W****I****L****A****S****I****K****H****R****F****I****L****R****K****S****M****L**  
KQ**H**ELDAQLLIKEISP**W**T**F**IKRSF**L****S****K****R****M****F****V****I****S****M****S****V****I****S****S****L****H****R****S****T****T****I****P****L****L****S****F****L****M****C****S****S****V****S****Y****A****L****F****K****T****S**  
**L****A****H****W****K****S****L****K****E****L****K****S****K****Y****S****V****Y****Y****Y**  
18 APEX2 residues

>CT222 (CTL0475)  
MR**C****C****C**VRTN**C**EEVRSSSTGDQVVS**A**VKERK**C**DSSLRRK**I****A****S****V****A****F****T****L****I****G****A****L****L****L****G****I****G****M****V****L****S****F****A****L**  
GSSAG**L****I****G****V****G****V****L****S****A****L****G****A****V****C****L****S****L****G****L****Y****K**LFLRMKRVSLDKAEQKMLEDQVELLRQENQELKAISV  
**F****H**  
8 APEX2 residues
